# Supplementary material for: High-pressure magnetic properties and electrical transport behaviors of half-metallic ferromagnet CrO2
Source: Royal Society of Chemistry journal article supplement (doi:10.1039/d2cp05684d), 2023-01-01
Supplement: d2cp05684d5.pdf [file d2cp05684d5.pdf]

**Electronic Supporting Information (ESI) for:**

**High-Pressure Magnetic Properties and Electrical Transport Behaviors of Half-Metallic Ferromagnet CrO<sub>2</sub>**

*Guozhao Zhang,<sup>a</sup> Shouxin Cui,<sup>a</sup> Haiwa Zhang,<sup>\*a</sup> Zhenbao Feng,<sup>a</sup> Guangyu Wang,<sup>a</sup> Qinglin Wang,<sup>\*a</sup> Yinwei Li,<sup>ab</sup> and Cailong Liu<sup>\*a</sup>*

<sup>a</sup>Shandong Key Laboratory of Optical Communication Science and Technology, School of Physical Science & Information Technology of Liaocheng University, Liaocheng 252059, China

<sup>b</sup>Laboratory of Quantum Functional Materials Design and Application, School of Physics and Electronic Engineering, Jiangsu Normal University, Xuzhou 221116, China

Email: [zhanghaiwa@lcu.edu.cn](mailto:zhanghaiwa@lcu.edu.cn); [wangqinglin@lcu.edu.cn](mailto:wangqinglin@lcu.edu.cn); [cailong\\_liu@jlu.edu.cn](mailto:cailong_liu@jlu.edu.cn)

**Table S1.** Details of the refinement for X-ray diffraction pattern.

|                       |                                                                                                |
|-----------------------|------------------------------------------------------------------------------------------------|
| Pressure              | Ambient pressure                                                                               |
| cryst syst            | Tetragonal                                                                                     |
| space group           | $P4_2/mnm$                                                                                     |
| Refine mode           | Le Bail fit                                                                                    |
| a/Å                   | 4.41492                                                                                        |
| b/Å                   | 4.41492                                                                                        |
| c/Å                   | 2.91466                                                                                        |
| volume/Å <sup>3</sup> | 56.811                                                                                         |
| R-factors             | R <sub>p</sub> =0.00300<br>R <sub>wp</sub> =0.00585<br>R <sub>exp</sub> =0.0217<br>Chi2=0.0706 |
| radiation             | Cu Kα ( $\lambda_{K\alpha 1}$ =1.54059 Å, $\lambda_{K\alpha 2}$ = 1.54431 Å)                   |
| 2θ range              | 20-90°                                                                                         |
| step                  | 0.02                                                                                           |

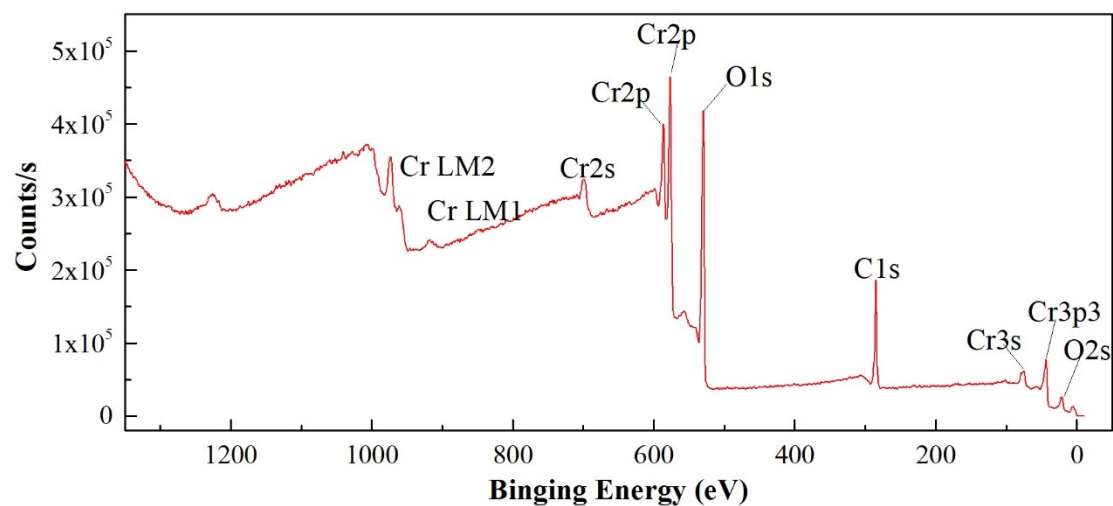

**Fig. S1** X-ray Photoelectron Spectroscopy of  $\text{CrO}_2$  at ambient conditions, C element is used for instrument calibration.

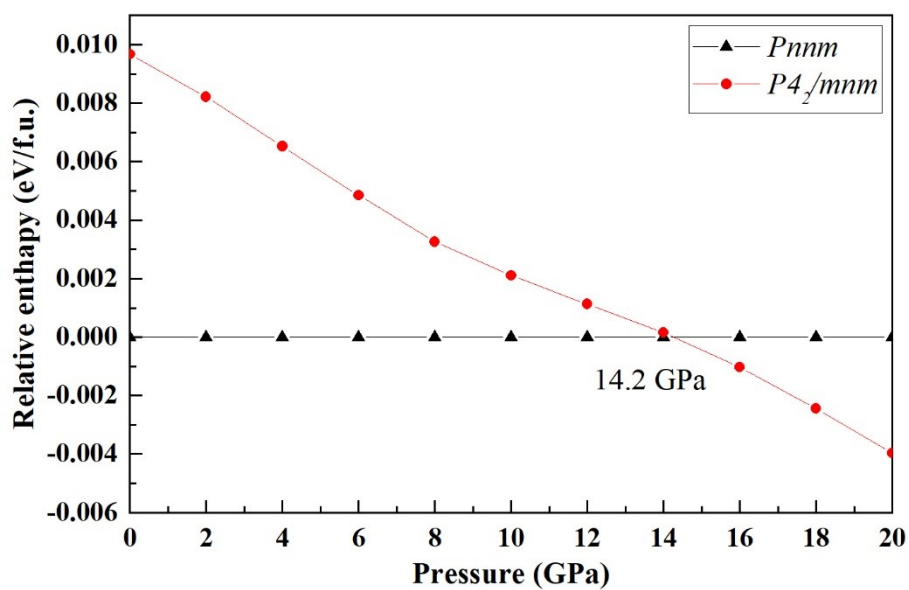

**Fig. S2** Relative enthalpies of  $\text{CaCl}_2$ -type ( $Pn\bar{m}$ ) structure of  $\text{CrO}_2$  compared to the rutile-type ( $P4_2/mnm$ ) structure under different pressures.

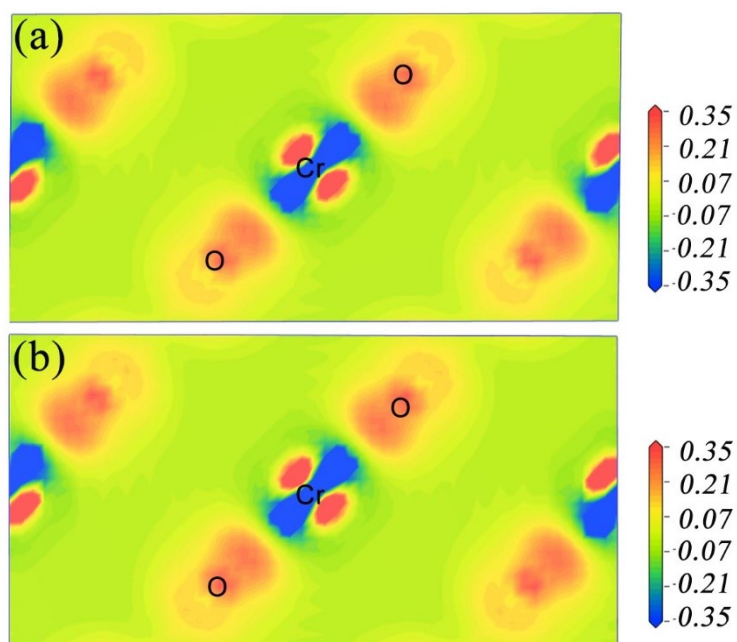

**Fig. S3** The calculated difference charge density of the rutile-type structure (10 GPa) and the CaCl<sub>2</sub>-type structure (16 GPa) for CrO<sub>2</sub>.
