# Supplementary figures and images for: High-pressure magnetic properties and electrical transport behaviors of half-metallic ferromagnet CrO2
Source: Royal Society of Chemistry journal article supplement (doi:10.1039/d2cp05684d), 2023-01-01

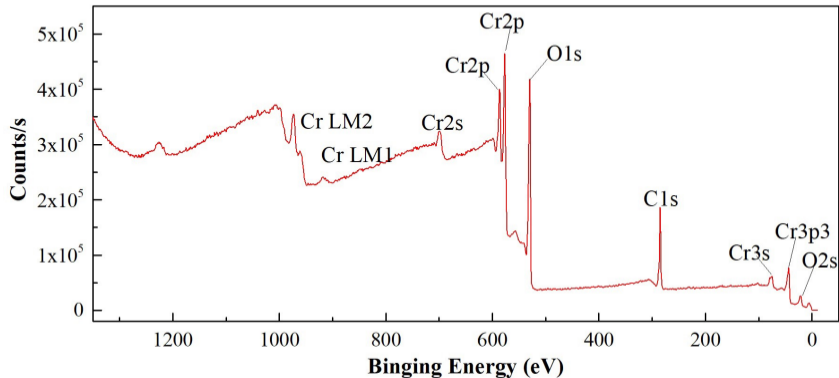

Supplement: d2cp05684d2.pdf [file d2cp05684d2.pdf]

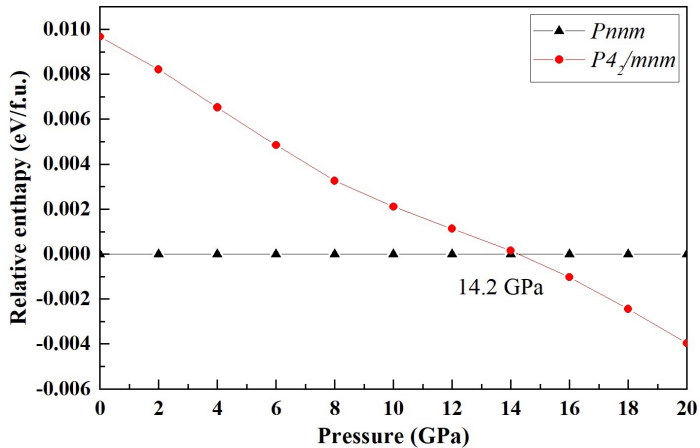

Supplement: d2cp05684d3.pdf [file d2cp05684d3.pdf]

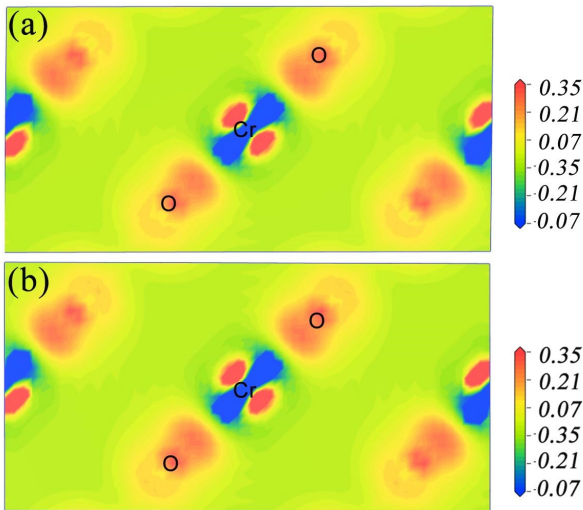

Supplement: d2cp05684d4.pdf [file d2cp05684d4.pdf]
